# Supplementary material for: A Novel Microshear Geometry for Exploring the Influence of Void Swelling on the Mechanical Properties Induced by MeV Heavy Ion Irradiation
Source: MDPI journal article supplement (doi:10.3390/ma15124253), 2022-06-15
Supplement: s1 [file s1]

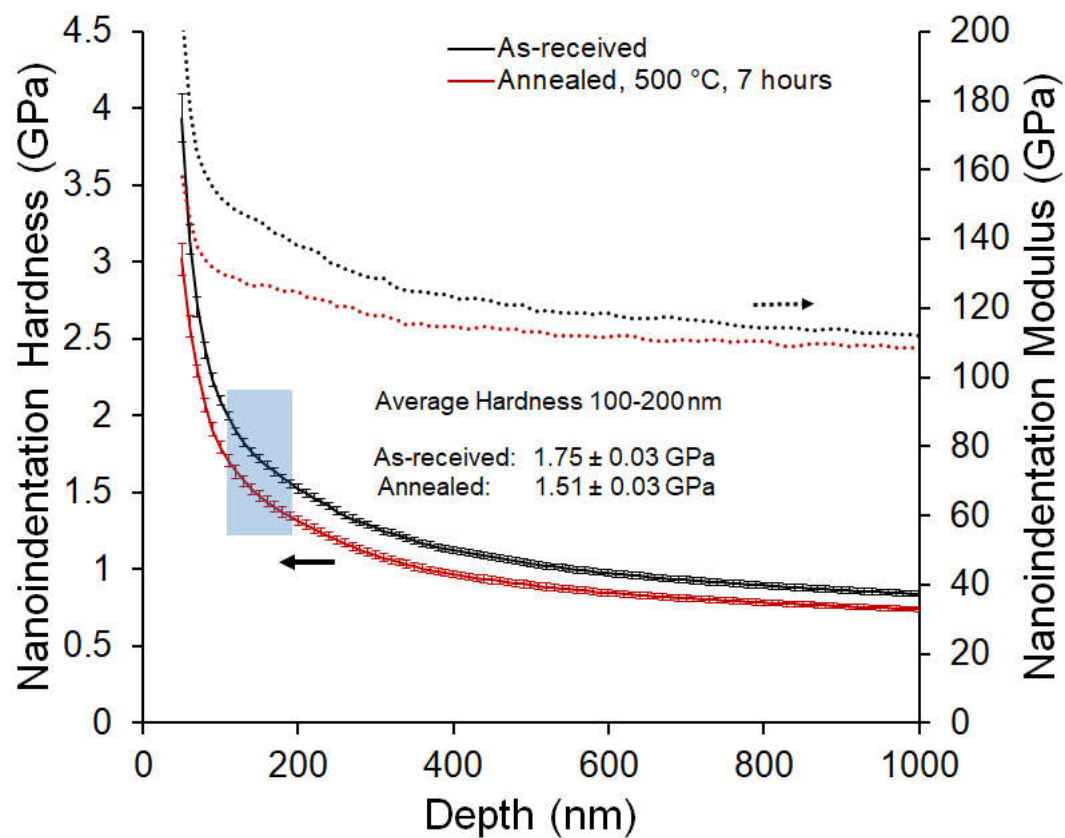

**Figure S1** – Nanoindentation hardness and modulus comparison for as-received and annealed single crystal copper. Sample annealed for same duration as 110 peak dpa irradiation.
